# Supplementary material
Source: Springer Nature journal article supplement (https://www.springermedizin.de/resource/supplementary/12881_2009_594_MOESM3_ESM.pdf/9451020)

2A

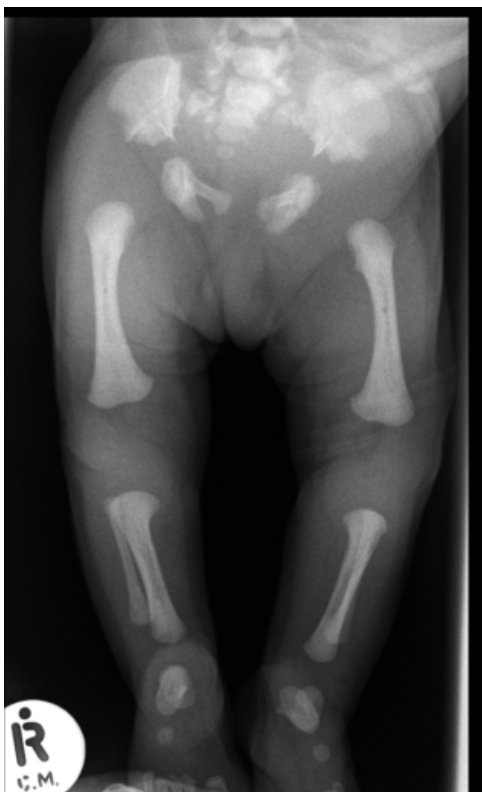

2B

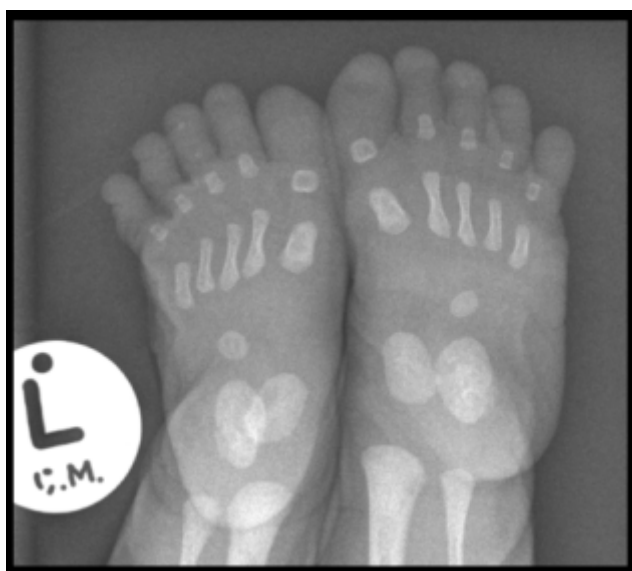

Supplement: MOESM3 [file 9451020]
